# Supplementary material
Source: PubMed Central journal article supplement (PMC3697647)
Supplement: JB.00180-13_zjb999092690so1.pdf [file JB.00180-13_zjb999092690so1.pdf]

**TABLE S1** Primers used in this study

| Primer name     | Sequence <sup>a</sup>                       |
|-----------------|---------------------------------------------|
| pJB2581 cloning |                                             |
| A0003-F         | CATGCGGATCCGTGAGTCGTCAGTATTTTGATTG          |
| A0003-R         | CGCATGCGTCGACTTACTATCGCTCTTTCACAAAGGTC      |
| A0007-F         | CATGCGGATCCATGATTAGATCTTATAGCTCATT          |
| A0007-R         | CGCATGCGTCGACTTAGTCCCTTAGATTAAGTCTGG        |
| A0017-F         | CATGCGGATCCATGGATTTTTTTTACCCTTTCCTC         |
| A0017-R         | CGCATGCGTCGACTTACGACAAATAATCAAATTGAG        |
| A0020-F         | CATGCGGATCCATGAATGATGATGAGAAAAAAAAGC        |
| A0020-R         | CGCATGCGTCGACTTAACTTGGATCGATTTTTCGTGG       |
| A0021-F         | CATGCGGATCCATGGGTATCAAAGTGCAAGATCTTG        |
| A0021-R         | CGCATGCGTCGACTTACTGCGTCCTTCTGGCATAGG        |
| A0022-F         | CATGCGGATCCCTTGAAAAATTTAAAAATAATTGG         |
| A0022-R         | CGCATGCGTCGACTTACTATGCGTTATCCACTGTTTC       |
| A0024-F         | CATGCGGATCCATGTTAGCAGCGCATTTAATCTTCTC       |
| A0024-R         | CGCATGCGTCGACCTAAGGGTGGGGCACATCTACTTTC      |
| A0025-F         | CATGCGGATCCCTTGAATAAGCCAAATGATGGG           |
| A0025-R         | CGCATGCGTCGACTTACTATTTGAAATTCTTTCCTC        |
| A0026-F         | CATGCGGATCCATGATTGTCTATCGAAGCCTAG           |
| A0026-R         | CGCATGCGTCGACTTAAATAAGAAGCAATGATTTTG        |
| A0028-F         | CATGCGGATCCATGAGGATATTTAAAACACGC            |
| A0028-R         | CGCATGCGTCGACTTATCACAGCACCTCTATCAGTTC       |
| A0031-F         | CATGCGGATCCGTGTCAATTTTTGGATTTACATAGC        |
| A0031-R         | CGCATGCGTCGACTTATCTTCTATACAAATTCATCCC       |
| A0032-F         | CATGCGGATCCATGGAAGATAACTGCATTAATAATTG       |
| A0032-R         | CGCATGCGTCGACTTATTTTATCCAAATACAGTTAGTTTC    |
| A0033-F         | CATGCGGATCCATGAATCCTAAAGATTTACTC            |
| A0033-R         | CGCATGCGTCGACTTAAATTATCTTTCCCCCTTCTAC       |
| A0034-F         | CATGCGGATCCCTTGGGCGCTTACTTTAGGC             |
| A0034-R         | CGCATGCGTCGACTTATCAACATTTTATCATCAGAGG       |
| KA0014-F        | CATGCGGATCCATGAGCTGGGAAAATTTTATCGC          |
| KA0014-R        | CGCATGCGTCGACTTATTATAAAAAATTTCCACCATCGTC    |
| KA0026-F        | CATGCGGATCCATGCCTAAAAAACTCGTACCCAAAG        |
| KA0026-R        | CGCATGCGTCGACTTATTATTGGGAGCACCATTCAAGCTC    |
| KA0027-F        | CATGCGGATCCCTTGCTTAACTGGTTAAAAATCAGAGC      |
| KA0027-R        | CGCATGCGTCGACTTATTAGGAATGGTCCGCCGCGCAAATC   |
| KA0028-F        | CATGCGGATCCATGATGCTTATGTTTTTTCATTAAAAAAG    |
| KA0028-R        | CGCATGCGTCGACTTATTAAGCAAGGTCGTTACGGCCG      |
| DA0009-F        | CATGC GGATCC ATG CAA CGC CAT TAC AAA ACA AC |
| DA0009-R        | CGCATGCGTCGACTTACTTCGTAAGTGGTGTG            |
| DA0010-F        | CATGCGGATCCATGGACCGAATGGAATTTAACAAACG       |
| DA0010-R        | CGCATGCGTCGACTTAAATTCACACCACTTAGCG          |
| DA0011-F        | CATGCGGATCCATGAAACGTTTACTTTCTGCTTTAC        |
| DA0011-R        | CGCATGCGTCGACTTATTTTCTTAATACAACCGTTG        |
| DA0012-F        | CATGCGGATCCATGCGTTCTAGTTTTAGACAGAATC        |
| DA0012-R        | CGCATGCCTGCAGTTATCATCCATCAAGAGTGGGTG        |
| DA0014-F        | CATGCGGATCCATGAAAAACGTGATATTCAAGAAAAG       |
| DA0014-R        | CGCATGCGTCGACTTATATCCTTAGCTTTGAATATTC       |
| DA0020-F        | CATGCGGATCCATGAAGTTTTTTATCCGGAAGGC          |
| DA0020-R        | CGCATGCGTCGACTTATCATCTCCGTTTCTTCGTTAAG      |
| DA0021-F        | CATGCGGATCCGTGCAGCCGGGAACGGCGATGAC          |
| DA0021-R        | CGCATGCGTCGACTTACTATGTTTTACCATTGCCTTC       |
| DA0022-F        | CATGCGGATCCCTTGATTTTCTAAATACAGAAATC         |
| DA0022-R        | CGCATGCGTCGACTTACTAATCTATATTAAGAACTGATATTC  |

---

|          |                                                |
|----------|------------------------------------------------|
| DA0023-F | CATGCGGATCCATGAATATATCACGCTGCATAAG             |
| DA0023-R | CGCATGCGT <u>CGACTT</u> ACTAATAAAGCCTCATCGCTTC |
| DA0024-F | CATGCGGATCCATGTGTGAACGCGCTTTAGTGCACC           |
| DA0024-R | CGCATGCGT <u>CGACTT</u> ACTATTGCAGAATGCAAGGGC  |
| DA0059-F | CATGCGGATCCATGGAAATAACGGGCCGCTCATTG            |
| DA0059-R | CGCATGCGT <u>CGACTT</u> ATCAATGATCCGATGTGCG    |

pENTR cloning

|                   |                                      |
|-------------------|--------------------------------------|
| GFP-CpeG-F        | CACCATGGGCAATAAGCCAAATGATGGG         |
| GFP-CpeG-R        | TTACTATTTGAAATTCCTTCCTC              |
| GFP-CpeH-F        | CACCATGGGCGGCGCTTACTTTAGGC           |
| GFP-CpeH-R        | TTATCAACATTTTATCATCAGAGG             |
| GFP-CpeI-F        | CACCATGGGCCAACGCCATTACAAAACAACAACC   |
| GFP-CpeI-R        | TTACTTCGCTAAGTGGTGTGAATTAAATG        |
| GFP-CpeJ-F        | CACCATGGGCCAAAAACGTGATATTCAAGAAAAGTC |
| GFP-CpeJ-R        | TTATATCCTTAGCTTTG                    |
| GFP-CpeK-F        | CACCATGAATATATCACGCTGTATAAG          |
| GFP-CpeK-R        | TTACTAATAAAGCCTCATCGCTTCCTCATG       |
| GFP-CpeL-F        | CACCATGGGCATGTGTGAACGCGCTTTAGTGCAC   |
| GFP-CpeL-R        | TTACTATTGCAGAATGCAAGGGCTATC          |
| GFP-CpeL-SEL1-1 F | CACCATGGGCGCTGATGCTATGGACTGGCGTGCC   |
| GFP-CpeL-SEL1-2 F | CACCATGGGCGCTAAGTCGATGATTGCTCTTGCTCG |
| GFP-CpeL-SEL1-3 F | CACCATGGGCGATTTGAGTGATATCGACGACGAAC  |

RT-PCR

|                   |                             |
|-------------------|-----------------------------|
| DA0023 Internal-F | TTATGTGACAAGGCGATCGTATTACG  |
| DA0024 Internal-R | ACCTTTACCTGTTTGATACATGTAGGC |

---

\*Underline indicates restriction sites in primer
